# Supplementary material for: Traditional Chinese medicine, a solution for reducing dual stroke risk factors at once?
Source: Royal Society of Chemistry journal article supplement (doi:10.1039/c1mb05164d), 2011-07-28
Supplement: c1mb05164d.pdf [file c1mb05164d.pdf]

## Supplementary Tables and Figures

**Table S1.** The pharmacophore hypothesis for PDE4D ligand.

| Hypothesis | Total Cost | Cost difference | Error Cost | RMS   | R value | Feature |
|------------|------------|-----------------|------------|-------|---------|---------|
| 1          | 305.64     | 190.78          | 287.965    | 1.601 | 0.851   | AHHHZ   |
| 2          | 308.29     | 188.13          | 292.176    | 1.643 | 0.842   | AHHHH   |
| 3          | 311.09     | 185.33          | 295.102    | 1.671 | 0.836   | AHHHH   |
| 4          | 311.30     | 185.13          | 295.178    | 1.672 | 0.836   | AHHHH   |
| 5          | 312.62     | 183.81          | 296.513    | 1.685 | 0.833   | AHHHH   |
| 6          | 313.01     | 183.41          | 294.947    | 1.669 | 0.837   | AHHH    |
| 7          | 314.82     | 181.61          | 297.399    | 1.693 | 0.832   | AHHHZ   |
| 8          | 316.28     | 180.15          | 299.873    | 1.716 | 0.826   | AHHHH   |
| 9          | 316.54     | 179.89          | 298.248    | 1.701 | 0.830   | AHHH    |
| 10         | 317.67     | 178.76          | 301.657    | 1.733 | 0.823   | AHHHH   |

Null cost: 496.43. Fixed cost: 224.52. Configuration cost: 14.851. Hydrogen bond acceptors (A), hydrophobic (H), and negative ionizable features (Z) were identified and analyzed for modeling.

**Table S2.** The pharmacophore hypothesis for ALOX5AP ligand.

| <b>Hypothesis</b> | <b>Total Cost</b> | <b>Cost difference</b> | <b>Error Cost</b> | <b>RMS</b> | <b>R value</b> | <b>Feature</b> |
|-------------------|-------------------|------------------------|-------------------|------------|----------------|----------------|
| 1                 | 153.97            | 41.92                  | 137.94            | 1.669      | 0.768          | AHHHH          |
| 2                 | 158.10            | 37.80                  | 142.489           | 1.761      | 0.737          | AHHHZ          |
| 3                 | 162.57            | 33.33                  | 146.511           | 1.838      | 0.709          | AHHHZ          |
| 4                 | 164.18            | 31.71                  | 148.412           | 1.873      | 0.695          | AHHHH          |
| 5                 | 164.20            | 31.70                  | 148.211           | 1.869      | 0.697          | AHHHH          |
| 6                 | 164.87            | 31.03                  | 149.201           | 1.887      | 0.689          | AHHHH          |
| 7                 | 165.76            | 30.13                  | 147.518           | 1.856      | 0.702          | AHHHZ          |
| 8                 | 166.20            | 29.70                  | 150.449           | 1.910      | 0.680          | AHHHH          |
| 9                 | 166.72            | 29.17                  | 149.387           | 1.891      | 0.688          | AHHHH          |
| 10                | 166.82            | 29.08                  | 151.152           | 1.923      | 0.675          | AHHH           |

Null cost: 195.90. Fixed cost: 113.12. Configuration cost: 14.452. Hydrogen bond acceptors (A), hydrophobic (H), and negative ionizable features (Z) were identified and analyzed for modeling.

**Table S3.** The interaction energy (kcal/mol) with divalent metal cations for both TCM candidates and L-454560.

| Ligand             | $Zn^{2+}$          |                                  |                        | $Mg^{2+}$          |                                  |                        |
|--------------------|--------------------|----------------------------------|------------------------|--------------------|----------------------------------|------------------------|
|                    | Interaction Energy | Electrostatic Interaction Energy | VDW Interaction Energy | Interaction Energy | Electrostatic Interaction Energy | VDW Interaction Energy |
| Myristic acid      | -290.095           | -297.044                         | 6.949                  | -254.020           | -259.442                         | 5.422                  |
| Pentadecanoic acid | -257.359           | -262.071                         | 4.713                  | -279.822           | -284.465                         | 4.643                  |
| L-454560           | -80.551            | -86.800                          | 6.249                  | -16.621            | -16.473                          | -0.147                 |

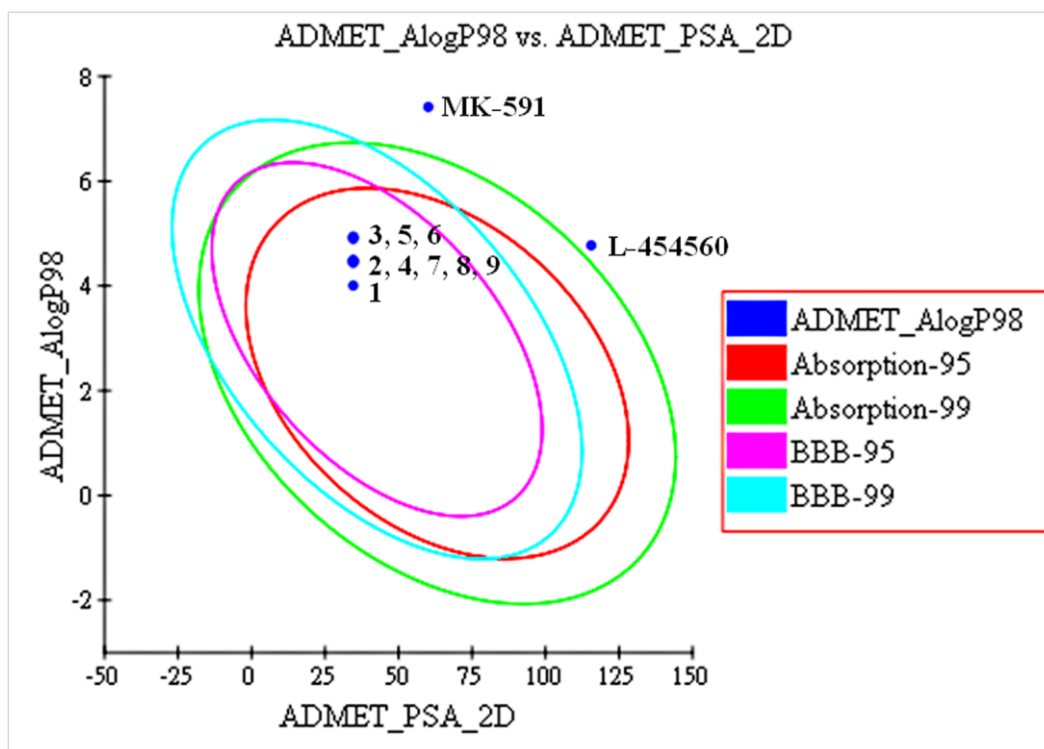

**Figure S1.** Human intestinal absorption model for (1) Myristic acid, (2) Pentadecanoic acid, (3) 2-pentadecenoic acid, (4) 2-hexadecenoic acid, (5) 9,12-Octadecadienoic acid, (6) Hexadecanoic acid, (7) 11-hexadecenoic acid, (8) Palmitoleic acid, (9) Punicic acid, and controls, L-454560 and MK-591.

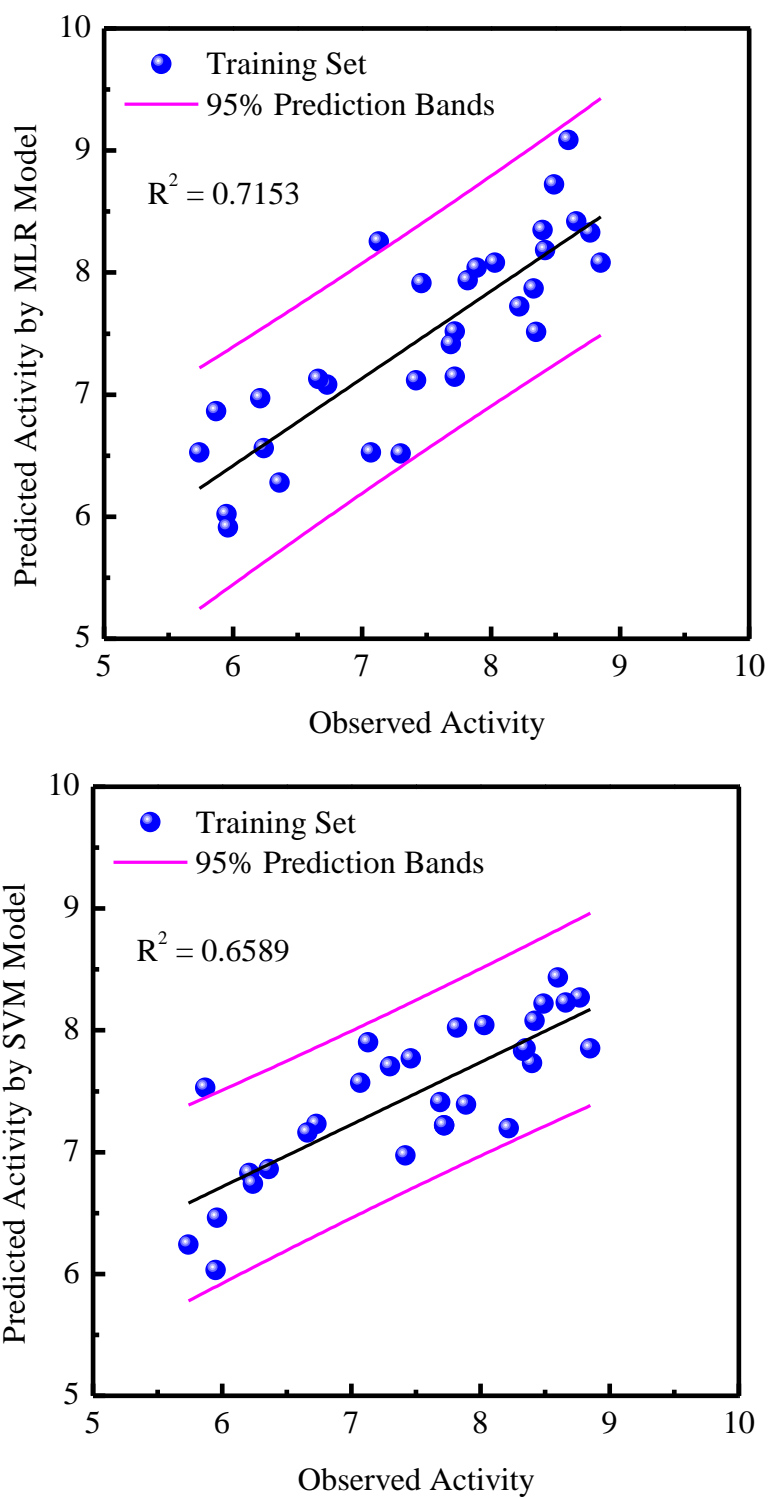

**Figure S2.** Comparative plots of MLR (top) and SVM (bottom) models for ALOX5AP inhibitors. Correlation trend (black line) and 95% confidence regions (enclosed by magenta lines) were shown. Training set (blue dots) was presented.

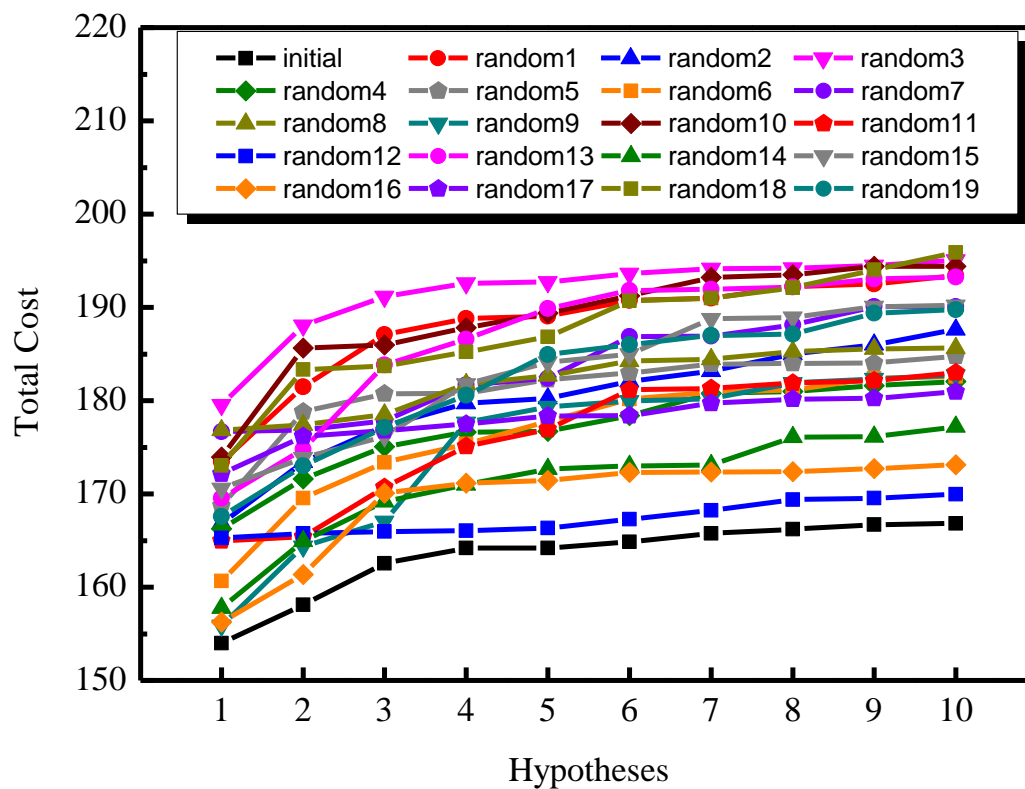

**Figure S3.** CatScramble validation plot for ALOX5AP that compares Total costs between initial and randomized HypoGen hypothesis.
